# Supplementary material for: Genome-wide epigenetic variation among ash trees differing in susceptibility to a fungal disease
Source: PubMed Central journal article supplement (PMC6022711; doi:10.1186/s12864-018-4874-8), 2018-06-28
Supplement: 12864_2018_4874_MOESM1_ESM.pdf [file 12864_2018_4874_MOESM1_ESM.pdf]

| Sample                   | Million raw reads      | Million reads<br>post-QC | Million mapped<br>reads | Million cytosines<br>covered >3 reads | Conversion<br>Rate (%) | Mean Methylation (%) |              |              |
|--------------------------|------------------------|--------------------------|-------------------------|---------------------------------------|------------------------|----------------------|--------------|--------------|
|                          |                        |                          |                         |                                       |                        | CG                   | CHG          | CHH          |
| F. mand 1                | 114.5 (13.0x)          | 82.2 (8.5x)              | 61.1 (7.7x)             | 27.4                                  | 98.77                  | 75.16                | 60.46        | 16.47        |
| F. mand 2                | 115.8 (13.2x)          | 85.8 (8.8x)              | 65.6 (8.3x)             | 34.4                                  | 98.55                  | 74.60                | 57.77        | 13.72        |
| F. mand 3                | 91.6 (10.4x)           | 63.4 (6.5x)              | 46.9 (5.9x)             | 20.8                                  | 98.56                  | 76.58                | 62.93        | 15.46        |
| <b>F. mand pooled</b>    | <b>322.0 (36.6x)</b>   | <b>231.3 (23.8x)</b>     | <b>173.6 (22.0x)</b>    |                                       |                        |                      |              |              |
| F. exc 27-1              | 87.3 (9.9x)            | 61.7 (6.3x)              | 50.2 (6.4x)             | 24.9                                  | 99.07                  | 82.07                | 68.03        | 18.45        |
| F. exc 27-2              | 104.7 (11.9x)          | 74.0 (7.6x)              | 61.4 (7.8x)             | 29.1                                  | 99.12                  | 82.55                | 68.04        | 16.87        |
| <b>F. exc 27 pooled</b>  | <b>192.1 (21.8x)</b>   | <b>135.7 (13.9x)</b>     | <b>111.6 (14.1x)</b>    |                                       |                        |                      |              |              |
| F. exc 33-1              | 87.5 (9.9x)            | 58.5 (6.0x)              | 49.1 (6.2x)             | 24.4                                  | 99.05                  | 82.63                | 67.92        | 17.07        |
| F. exc 33-2              | 124.9 (14.2x)          | 85.5 (8.8x)              | 74.3 (9.4x)             | 43.3                                  | 99.08                  | 81.05                | 62.64        | 13.09        |
| F. exc 33-3              | 111.7 (12.7x)          | 74.8 (7.7x)              | 65.0 (8.2x)             | 35.2                                  | 99.27                  | 81.09                | 64.19        | 14.51        |
| F. exc 33-4              | 119.6 (13.6x)          | 82.4 (8.5x)              | 68.8 (8.7x)             | 33.3                                  | 98.92                  | 81.77                | 65.70        | 17.13        |
| F. exc 33-5              | 69.8 (7.9x)            | 46.9 (4.8x)              | 38.5 (4.9x)             | 18.4                                  | 98.97                  | 83.66                | 70.55        | 22.66        |
| <b>F. exc 33 pooled</b>  | <b>513.5 (58.4x)</b>   | <b>348.0 (35.8x)</b>     | <b>295.7 (37.4x)</b>    |                                       |                        |                      |              |              |
| F. exc 35-1              | 116.6 (13.3x)          | 81.2 (8.4x)              | 67.1 (8.5x)             | 31.9                                  | 98.98                  | 82.20                | 66.46        | 18.06        |
| F. exc 35-2              | 128.8 (14.6x)          | 90.4 (9.3x)              | 74.4 (9.4x)             | 34.2                                  | 99.15                  | 81.55                | 65.45        | 17.97        |
| F. exc 35-3              | 112.0 (12.7x)          | 81.0 (8.4x)              | 68.4 (8.7x)             | 31.9                                  | 99.26                  | 80.47                | 63.27        | 14.04        |
| F. exc 35-4              | 106.4 (12.2x)          | 70.4 (7.3x)              | 57.4 (7.3x)             | 23.4                                  | 99.29                  | 79.73                | 64.75        | 16.17        |
| F. exc 35-5              | 61.2 (7.0x)            | 39.4 (4.1x)              | 31.8 (4.0x)             | 13.3                                  | 99.17                  | 81.02                | 68.79        | 19.54        |
| <b>F. exc 35 pooled</b>  | <b>524.9 (59.7x)</b>   | <b>362.5 (37.3x)</b>     | <b>299.2 (38.0x)</b>    |                                       |                        |                      |              |              |
| F. exc 40-1              | 41.2 (4.7x)            | 26.1 (2.7x)              | 21.8 (2.8x)             | 10.5                                  | 99.03                  | 83.45                | 71.28        | 18.02        |
| F. exc 40-2              | 120.4 (13.7x)          | 86.4 (8.9x)              | 70.7 (8.9x)             | 33.8                                  | 99.05                  | 81.54                | 65.80        | 19.21        |
| F. exc 40-3              | 121.0 (13.8x)          | 83.1 (8.5x)              | 64.2 (8.1x)             | 32.3                                  | 98.77                  | 81.58                | 65.18        | 17.07        |
| F. exc 40-4              | 113.6 (12.9x)          | 79.6 (8.2x)              | 65.0 (8.2x)             | 32.1                                  | 98.59                  | 82.25                | 66.39        | 17.14        |
| F. exc 40-5              | 103.8 (11.8x)          | 73.4 (7.5x)              | 60.1 (7.6x)             | 28.1                                  | 99.14                  | 82.41                | 67.97        | 20.31        |
| <b>F. exc 40 pooled</b>  | <b>500.1 (56.8x)</b>   | <b>348.6 (35.8x)</b>     | <b>281.8 (35.7x)</b>    |                                       |                        |                      |              |              |
| <b>All F. exc pooled</b> | <b>1730.6 (196.7x)</b> | <b>1194.8 (122.8x)</b>   | <b>988.3 (125.2x)</b>   | <b>164.4</b>                          | <b>99.23</b>           | <b>76.18</b>         | <b>52.04</b> | <b>13.92</b> |

WGBS yield for twenty ash samples. Approximate 880 Mbp genome coverage values in brackets. Coverage value in mapped reads columns shows coverage of 718 Mbp non-N genome. Conversion efficiency for each sample was used in separate binomial tests as described in Methods. Mean Methylation (%) describes percentage of cytosines in each sequence context that are methylated.
