# Supplementary material for: Genome-wide epigenetic variation among ash trees differing in susceptibility to a fungal disease
Source: PubMed Central journal article supplement (PMC6022711; doi:10.1186/s12864-018-4874-8), 2018-06-28
Supplement: 12864_2018_4874_MOESM2_ESM.pdf [file 12864_2018_4874_MOESM2_ESM.pdf]

Most consistently differentially methylated homeologs. Counts depict how many times the pair is present in the lowest ten p-values across all *F. excelsior* samples. Note that the table is split into CG, CHG, and CHH contexts (CHG and CHH continued onto next page).

| Gene 1     | Gene 2 | Count | Function                                                                                             | GO terms                                                                                                                                                                                    |
|------------|--------|-------|------------------------------------------------------------------------------------------------------|---------------------------------------------------------------------------------------------------------------------------------------------------------------------------------------------|
| <b>CG</b>  |        |       |                                                                                                      |                                                                                                                                                                                             |
| 150950     | 150960 | 13    | FAD-linked oxidase, N-terminal                                                                       | Several, e.g. GO:0050660 (MF: Flavin-adenine dinucleotide binding), GO:0006950 (BP: response to stress), GO:0006040 (BP: amino sugar metabolic process)                                     |
| 133990     | 299030 | 10    | kinesin-like protein, atp-binding                                                                    | Several, e.g. GO:0007018 (BP: microtubule based movement), GO:0008569 (MF: ATP-dependent microtubule motor activity), GO:0005871 (CC: kinesin complex)                                      |
| 146520     | 329760 | 9     | dihydrolypoyllysine-residue acetyltransferase component of pyruvate dehydrogenase mitochondrial-like | Several, e.g. GO:0009941 (CC: chloroplast envelope), GO:0022626 (CC: cytosolic ribosome), GO:0016746 (MF: transferase activity)                                                             |
| 227480     | 280260 | 6     | mfp1 attachment factor 1-like                                                                        | GO:0005515 (MF: protein binding), GO:0043231 (CC: intracellular membrane-bound organelle)                                                                                                   |
| 285590     | 398790 | 5     | ring-h2 finger protein                                                                               | GO:0008270 (MF: zinc ion binding)                                                                                                                                                           |
| 169730     | 353730 | 5     | cationic amino acid transporter                                                                      | Several, e.g. GO:0003333 (BP: amino acid transmembrane transport), GO:0005886 (CC: plasma membrane)                                                                                         |
| 115990     | 166400 | 5     | inter-alpha-trypsin inhibitor heavy                                                                  | GO:0016020 (CC: membrane)                                                                                                                                                                   |
| 113170     | 126410 | 5     | anthocyanin 5-aromatic                                                                               | GO:0047672 (MF: anthranilate N-benzoyltransferase activity), GO:0080167 (BP: response to karrikin (plant growth regulator))                                                                 |
| 159580     | 240960 | 4     | laccase 110am multicopper oxidase                                                                    | Several e.g. GO:0046688 (BP: response to copper ion), GO:0005507 (MF: copper ion binding), GO:0052716 (MF: hydroquinone:oxygen oxidoreductase activity),                                    |
| 250570     | 373520 | 4     | snrk1-interacting protein 1                                                                          | GO:0009507 (CC:chloroplast)                                                                                                                                                                 |
| <b>CHG</b> |        |       |                                                                                                      |                                                                                                                                                                                             |
| 094250     | 368880 | 17    | atpase splayed                                                                                       | GO:0003677(MF: DNA binding), GO:0005524(MF: ATP binding), GO:0004386 (MF: helicase activity)                                                                                                |
| 133990     | 299030 | 17    | kinesin-like protein, atp-binding                                                                    | Several, e.g. GO:0007018 (BP: microtubule based movement), GO:0008569 (MF: ATP-dependent microtubule motor activity), GO:0005871 (CC: kinesin complex)                                      |
| 026950     | 114060 | 15    | None annotated                                                                                       | GO:0003676(MF: nucleic acid binding), GO:0003723 (MF: RNA binding), GO:0006396 (BP: RNA processing)                                                                                         |
| 307070     | 375990 | 14    | Zinc finger, PHD-type                                                                                | GO:0008270 (MF: zinc ion binding)                                                                                                                                                           |
| 013250     | 272830 | 13    | None annotated                                                                                       | No GO terms. IPR 020864 (Membrane attack complex component/perforin (MACPF) domain)                                                                                                         |
| 339290     | 380270 | 12    | FAD-linked oxidase                                                                                   | Several, e.g. GO:0050660(MF: flavin adenine dinucleotide binding), GO:0006979(BP: response to oxidative stress), GO:0009793 (BP: embryo development), GO:0010197 (BP: polar nucleus fusion) |
| 327050     | 381680 | 12    | cytosolic fe-s cluster assembly factor nbp35                                                         | GO:0005524 (MF: ATP binding), GO:0042803 (MF: protein homodimerization activity), GO:0051536(MF: iron-sulfur cluster binding)                                                               |
| 155290     | 378020 | 11    | cytosolic delta subunit                                                                              | Several e.g. GO:0006457 (BP: protein folding), GO:0046686 (BP: response to cadmium ion), GO:0005524 (MF: ATP binding)                                                                       |
| 024730     | 073330 | 9     | regulatory-associated protein of tor 1-like                                                          | GO:0009793 (BP: embryo development), GO:0016049 (BP: cell growth)                                                                                                                           |
| 383510     | 395700 | 8     | None annotated                                                                                       | GO:0005515 (MF: protein binding), IPR017986 (WD40-repeat-containing domain), IPR006594 (LisH homology motif)                                                                                |

CHH results on next page

| Gene 1     | Gene 2 | Count | Function                                                              | GO terms                                                                                                                                           |
|------------|--------|-------|-----------------------------------------------------------------------|----------------------------------------------------------------------------------------------------------------------------------------------------|
| <b>CHH</b> |        |       |                                                                       |                                                                                                                                                    |
| 030090     | 095610 | 15    | None annotated                                                        | GO:0003755 (MF: peptidyl-prolyl cis-trans isomerase activity ), GO:0006457 (BP: protein folding)                                                   |
| 055530     | 207470 | 13    | mediator of rna polymerase ii transcription subunit                   | GO:0001104 (MF: RNA polymerase II transcription cofactor activity), GO:0016592 (CC: mediator complex)                                              |
| 091230     | 270880 | 10    | actin associated protein                                              | GO:0009536 (CC: plastid)                                                                                                                           |
| 208290     | 254280 | 10    | nucleoprotein tpr                                                     | GO:0044699 (BP: single organism process), GO:0044428 (CC: nuclear part), GO:0009987 (BP: cellular process)                                         |
| 105380     | 292350 | 10    | p-loop containing ntpase domain-containing protein                    | GO:0005524 (MF: ATP binding), GO:0017111 (MF: nucleoside-triphosphatase activity), GO:0005739 (CC: mitochondrion)                                  |
| 163800     | 175560 | 8     | udp-n-acetylmuramoyl-l-alanyl-d-glutamate-diaminopimelate ligase-like | Several, e.g. GO:0007049 (BP: cell cycle), GO:0009658 (BP: chloroplast organisation), GO:0009252 (BP: peptidoglycan biosynthetic process)          |
| 024720     | 073340 | 7     | None annotated                                                        | GO:0005622 (CC: intracellular), GO:0006886 (BP: intracellular protein transport)                                                                   |
| 346190     | 353990 | 6     | None annotated (LRR-containing)                                       | GO:0016301 (MF: kinase activity), GO:0016491 (MF: oxidoreductase activity), GO:0016310 (BP: phosphorylation)                                       |
| 091760     | 125860 | 6     | None annotated                                                        | GO:0055114 (BP: oxidation-reduction process), GO:0010087 (BP: phloem or xylem histogenesis), GO:0032875 (BP: regulation of DNA endoreduplication), |
