# Supplementary material for: Genome-wide epigenetic variation among ash trees differing in susceptibility to a fungal disease
Source: PubMed Central journal article supplement (PMC6022711; doi:10.1186/s12864-018-4874-8), 2018-06-28
Supplement: 12864_2018_4874_MOESM4_ESM.pdf [file 12864_2018_4874_MOESM4_ESM.pdf]

Genomic positions with most effect on separation of the two *Fraxinus* species, based on loading along PC1. Only two positions were within gene regions: Contig2376 position 21815 is within gene 119700, a phospholipid-translocating ATPase, and Contig 8085 position 87294 lies within gene 356660, an RNA recognition motif-containing protein.

| Contig | Position | Context | PC1 Loading | Mean methylation<br><i>F. mandshurica</i> | Mean methylation<br><i>F. excelsior</i> |
|--------|----------|---------|-------------|-------------------------------------------|-----------------------------------------|
| 5381   | 50342    | CHH     | -0.0127     | 1.000                                     | 0.046                                   |
| 1525   | 59199    | CG      | -0.0120     | 1.000                                     | 0.026                                   |
| 3593   | 6587     | CHH     | -0.0118     | 1.000                                     | 0.147                                   |
| 2376   | 21815    | CHH     | -0.0116     | 1.000                                     | 0.124                                   |
| 2226   | 58007    | CG      | -0.0112     | 1.000                                     | 0.037                                   |
| 1525   | 59192    | CG      | -0.0107     | 0.976                                     | 0.022                                   |
| 3593   | 6605     | CHH     | -0.0102     | 0.961                                     | 0.062                                   |
| 1742   | 78238    | CHH     | -0.0100     | 0.961                                     | 0.047                                   |
| 1525   | 59187    | CG      | -0.0099     | 0.970                                     | 0.031                                   |
| 5567   | 17522    | CHH     | -0.0098     | 0.910                                     | 0.057                                   |
| 345    | 160178   | CHH     | -0.0095     | 1.000                                     | 0.290                                   |
| 1019   | 198545   | CHH     | -0.0095     | 1.000                                     | 0.162                                   |
| 537    | 163284   | CHH     | -0.0093     | 0.972                                     | 0.081                                   |
| 1183   | 127103   | CHH     | -0.0089     | 0.523                                     | 0.000                                   |
| 1525   | 59185    | CHG     | -0.0086     | 0.944                                     | 0.023                                   |
| 3339   | 39370    | CHH     | -0.0085     | 0.774                                     | 0.190                                   |
| 4458   | 28642    | CHH     | -0.0084     | 0.896                                     | 0.035                                   |
| 3147   | 44856    | CHH     | -0.0083     | 0.751                                     | 0.043                                   |
| 2376   | 112909   | CHH     | -0.0081     | 1.000                                     | 0.222                                   |
| 2271   | 6442     | CHH     | -0.0081     | 0.984                                     | 0.076                                   |
| 3225   | 5301     | CG      | 0.0133      | 0.000                                     | 0.985                                   |
| 2238   | 83939    | CHG     | 0.0133      | 0.000                                     | 0.963                                   |
| 2503   | 15395    | CHG     | 0.0129      | 0.000                                     | 0.973                                   |
| 3315   | 36341    | CG      | 0.0127      | 0.000                                     | 0.987                                   |
| 8085   | 87294    | CG      | 0.0125      | 0.000                                     | 0.974                                   |
| 1546   | 63329    | CHG     | 0.0124      | 0.000                                     | 0.969                                   |
| 1226   | 46428    | CG      | 0.0124      | 0.000                                     | 0.983                                   |
| 83324  | 24258    | CG      | 0.0123      | 0.000                                     | 0.968                                   |
| 87     | 308463   | CHG     | 0.0122      | 0.000                                     | 0.967                                   |
| 817    | 74700    | CG      | 0.0116      | 0.000                                     | 0.939                                   |
| 1013   | 39297    | CHG     | 0.0114      | 0.000                                     | 0.893                                   |
| 3129   | 72215    | CHG     | 0.0114      | 0.000                                     | 0.930                                   |
| 958    | 80855    | CHG     | 0.0109      | 0.000                                     | 0.768                                   |
| 5552   | 6983     | CG      | 0.0108      | 0.000                                     | 0.930                                   |
| 4818   | 47459    | CG      | 0.0107      | 0.091                                     | 0.967                                   |
| 1417   | 7761     | CHH     | 0.0105      | 0.000                                     | 0.719                                   |
| 2271   | 886      | CG      | 0.0105      | 0.000                                     | 0.956                                   |
| 48564  | 569      | CHG     | 0.0104      | 0.072                                     | 0.983                                   |
| 16     | 144183   | CG      | 0.0104      | 0.000                                     | 0.936                                   |
| 3829   | 27916    | CG      | 0.0104      | 0.321                                     | 0.983                                   |
