# Supplementary material for: Genome-wide epigenetic variation among ash trees differing in susceptibility to a fungal disease
Source: PubMed Central journal article supplement (PMC6022711; doi:10.1186/s12864-018-4874-8), 2018-06-28
Supplement: 12864_2018_4874_MOESM5_ESM.pdf [file 12864_2018_4874_MOESM5_ESM.pdf]

Average weighted methylation levels in twenty genes known to be associated with ADB susceptibility, for all low and high susceptibility samples. 'PD' is short for 'PREDICTED' in second column. Methylation levels only calculated for genes with at least ten cytosines of the sequence context in question, i.e. some genes only have CHH listed as there were <10 CG and CHG cytosines.  $\pm$  denotes standard error.

| Gene   | Top BLASTX hit                                                                | Mean weighted methylation                                               |                                                                         | T-test p-value                                   | FDR-corrected p-value                     |
|--------|-------------------------------------------------------------------------------|-------------------------------------------------------------------------|-------------------------------------------------------------------------|--------------------------------------------------|-------------------------------------------|
|        |                                                                               | Low susceptibility                                                      | High susceptibility                                                     |                                                  |                                           |
| 298540 | PD: calcium-transporting ATPase 9, plasma membrane-type [Erythranthe guttata] | CG:0.57 $\pm$ 0.08<br>CHG:0.003 $\pm$ 0.0018<br>CHH:0.0047 $\pm$ 0.002  | CG:0.46 $\pm$ 0.06<br>CHG:0.003 $\pm$ 0.0015<br>CHH:0.007 $\pm$ 0.0036  | CG:0.308<br>CHG:0.896<br>CHH:0.503               | CG:0.676<br>CHG:0.922<br>CHH:0.744        |
| 368850 | PD: uncharacterized protein LOC105163554 [Sesamum indicum]                    | CHG:0.012 $\pm$ 0.003<br>CHH:0.0145 $\pm$ 0.005                         | CHG:0.016 $\pm$ 0.009<br>CHH:0.022 $\pm$ 0.014                          | CHG:0.701<br>CHH:0.521                           | CHG:0.841<br>CHH:0.744                    |
| 261470 | soc1-like protein [Olea europaea]                                             | CG:0.898 $\pm$ 0.012<br>CHG:0.831 $\pm$ 0.014<br>CHH: 0.188 $\pm$ 0.012 | CG:0.946 $\pm$ 0.019<br>CHG:0.886 $\pm$ 0.012<br>CHH:0.202 $\pm$ 0.021  | <b>CG:0.037</b><br><b>CHG:0.016</b><br>CHH:0.537 | CG:0.444<br>CHG:0.288<br>CHH:0.744        |
| 251090 | PD: MADS-box protein SVP-like isoform X1 [Sesamum indicum]                    | CHH:0.026 $\pm$ 0.009                                                   | CHH:0.047 $\pm$ 0.015                                                   | CHH:0.223                                        | CHH:0.643                                 |
| 048340 | PD: MADS-box protein SVP-like [Sesamum indicum]                               | CG:0.854 $\pm$ 0.03<br>CHG:0.512 $\pm$ 0.046<br>CHH:0.098 $\pm$ 0.009   | CG:0.773 $\pm$ 0.037<br>CHG:0.521 $\pm$ 0.027<br>CHH:0.101 $\pm$ 0.015  | CG:0.300<br>CHG:0.879<br>CHH:0.848               | CG:0.657<br>CHG:0.922<br>CHH:0.922        |
| 178910 | PD: cinnamoyl-CoA reductase 2 [Sesamum indicum]                               | CHH:0.122 $\pm$ 0.037                                                   | CHH:0.078 $\pm$ 0.04                                                    | CHH:0.442                                        | CHH:0.723                                 |
| 245740 | PD: mitochondrial arginine transporter BAC2-like [Solanum pennellii]          | CHG:0.129 $\pm$ 0.03<br>CHH:0.155 $\pm$ 0.034                           | CHG:0.095 $\pm$ 0.016<br>CHH:0.157 $\pm$ 0.043                          | CHG:0.405<br>CHH:0.976                           | CHG:0.709<br>CHH:0.976                    |
| 173540 | PD: MADS-box protein SVP-like isoform X1 [Nelumbo nucifera]                   | CG:0.6410.033<br>CHG:0.454 $\pm$ 0.029<br>CHH:0.096 $\pm$ 0.021         | CG:0.697 $\pm$ 0.081<br>CHG:0.412 $\pm$ 0.07<br>CHH:0.057 $\pm$ 0.009   | CG:0.455<br>CHG:0.522<br>CHH:0.106               | CG:0.723<br>CHG:0.723<br>CHH:0.509        |
| 032420 | PD: uncharacterized protein LOC105168112 [Sesamum indicum]                    | CHH:0.101 $\pm$ 0.029                                                   | CHH:0.192 $\pm$ 0.056                                                   | CHH:0.131                                        | CHH:0.509                                 |
| 265110 | PD: potassium channel KAT3 [Erythranthe guttata]                              | CHH:0.023 $\pm$ 0.007                                                   | CHH:0.005 $\pm$ 0.003                                                   | CHH:0.123                                        | CHH:0.509                                 |
| 262400 | PD: serine/threonine-protein kinase AFC2 isoform X1 [Sesamum indicum]         | CG:0.595 $\pm$ 0.113<br>CHG:0.015 $\pm$ 0.009<br>CHH:0.006 $\pm$ 0.003  | CG:0.513 $\pm$ 0.059<br>CHG:0.003 $\pm$ 0.003<br>CHH:0.001 $\pm$ 0.0008 | CG:0.599<br>CHG:0.239<br>CHH:0.112               | CG:0.776<br>CHG:0.643<br>CHH:0.509        |
| 347350 | PD: glucuronoxylan 4-O-methyltransferase 1-like [Sesamum indicum]             | CHH:0.0025 $\pm$ 0.002                                                  | CHH:0.003 $\pm$ 0.003                                                   | CHH:0.858                                        | CHH:0.922                                 |
| 048360 | PD: MADS-box protein SVP-like isoform X1 [Sesamum indicum]                    | CG:0.772 $\pm$ 0.038<br>CHG:0.519 $\pm$ 0.052<br>CHH:0.135 $\pm$ 0.024  | CG:0.790 $\pm$ 0.026<br>CHG:0.590 $\pm$ 0.021<br>CHH:0.176 $\pm$ 0.009  | CG:0.737<br>CHG:0.228<br>CHH:0.126               | CG:0.86<br>CHG:0.643<br>CHH:0.509         |
| 199890 | PD: uncharacterized protein LOC105957157 [Erythranthe guttata]                | CHH:0.292 $\pm$ 0.053                                                   | CHH:0.193 $\pm$ 0.092                                                   | CHH:0.329                                        | CHH:0.657                                 |
| 178920 | PD: cinnamoyl-CoA reductase 2 [Sesamum indicum]                               | CG:0.574 $\pm$ 0.085<br>CHG:0.028 $\pm$ 0.008<br>CHH:0.018 $\pm$ 0.005  | CG:0.372 $\pm$ 0.028<br>CHG:0.107 $\pm$ 0.011<br>CHH:0.014 $\pm$ 0.006  | CG:0.087<br><b>CHG:&lt;0.001</b><br>CHH:0.645    | CG:0.509<br><b>CHG:0.007</b><br>CHH:0.806 |
| 249100 | PD: MADS-box protein SOC1-like isoform X1 [Sesamum indicum]                   | CG:0.864 $\pm$ 0.018<br>CHG:0.579 $\pm$ 0.051<br>CHH:0.132 $\pm$ 0.013  | CG:0.845 $\pm$ 0.041<br>CHG:0.456 $\pm$ 0.066<br>CHH:0.114 $\pm$ 0.011  | CG:0.634<br>CHG:0.159<br>CHH:0.399               | CG:0.806<br>CHG:0.557<br>CHH:0.709        |
| 318210 | PD: protein EMBRYONIC FLOWER 1 isoform X1 [Sesamum indicum]                   | CHG:0.020 $\pm$ 0.006<br>CHH:0.006 $\pm$ 0.004                          | CHG:0.008 $\pm$ 0.008<br>CHH:0.002 $\pm$ 0.001                          | CHG:0.297<br>CHH:0.338                           | CHG:0.657<br>CHH:0.657                    |
